# Supplementary material for: Association between Dietary Salt Intake and Progression in the Gastric Precancerous Process
Source: MDPI journal article supplement (doi:10.3390/cancers11040467), 2019-04-03
Supplement: s1 [file s1]

## Supplemental Materials

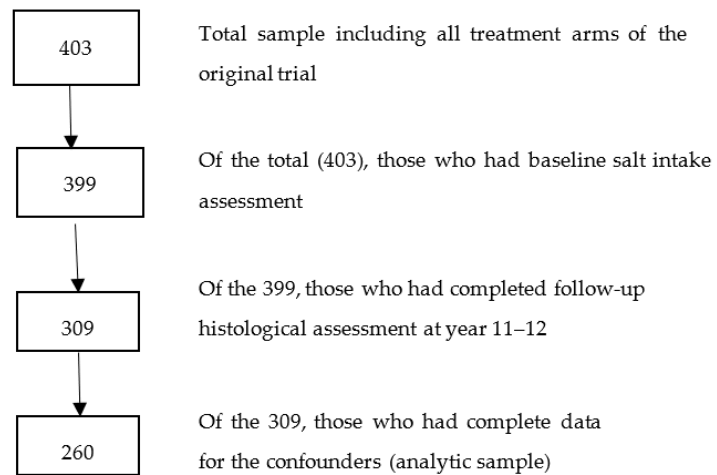

**Figure S1.** Sample Derivation Flowchart.

**Table S1** Adjusted risk ratios for the association between salt intake at five months defined by urinary sodium/creatinine ratio and progression in the gastric precancerous process (11–12 years compared to five months).

| Outcomes                                                                               | Overall                                       |                                                 | <i>H. pylori</i> +                            |                                                 | <i>H. pylori</i> -                            |                                                 | Persistent <i>H. pylori</i><br>(Positive at Five Months and 11–12 years) |                                                 |
|----------------------------------------------------------------------------------------|-----------------------------------------------|-------------------------------------------------|-----------------------------------------------|-------------------------------------------------|-----------------------------------------------|-------------------------------------------------|--------------------------------------------------------------------------|-------------------------------------------------|
|                                                                                        | <i>n</i> with: <i>n</i><br>without<br>Outcome | Risk Ratio (CI)<br><i>p</i> -Value <sup>a</sup> | <i>n</i> with: <i>n</i><br>without<br>Outcome | Risk Ratio (CI)<br><i>p</i> -Value <sup>a</sup> | <i>n</i> with: <i>n</i><br>without<br>Outcome | Risk Ratio (CI)<br><i>p</i> -Value <sup>a</sup> | <i>n</i> with: <i>n</i><br>without<br>Outcome                            | Risk Ratio (CI)<br><i>p</i> -Value <sup>a</sup> |
| Overall progression in the gastric precancerous process<br>Total <i>n</i> at risk =253 | 190:63                                        | 0.98 (0.90–1.07)<br><i>p</i> = 0.61             | 163:48                                        | 1.00 (0.91–1.09)<br><i>p</i> = 0.94             | 27:15                                         | 0.86 (0.66–1.11)<br><i>p</i> = 0.24             | 140:42                                                                   | 0.98 (0.89–1.07)<br><i>p</i> = 0.62             |
| Incident progression to atrophic gastritis<br>Total <i>n</i> at risk = 180             | 105:75                                        | 1.08 (0.97–1.21)<br><i>p</i> = 0.15             | 92:63                                         | 1.07 (0.95–1.19)<br><i>p</i> = 0.26             | 13:12                                         | 1.37 (0.91–2.08)<br><i>p</i> = 0.13             | 79:50                                                                    | 1.05 (0.93–1.17)<br><i>p</i> = 0.43             |
| Incident progression to intestinal metaplasia<br>Total <i>n</i> at risk = 198          | 90:108                                        | 1.01 (0.85–1.19)<br><i>p</i> = 0.93             | 80:88                                         | 1.01 (0.85–1.20)<br><i>p</i> = 0.92             | 10:20                                         | 1.15 (0.63–2.13)<br><i>p</i> = 0.65             | 69:74                                                                    | 1.00 (0.84–1.20)<br><i>p</i> = 0.97             |
| Incident progression to dysplasia or gastric cancer<br>Total <i>n</i> at risk =251     | 12:239                                        | 1.46 (1.11–1.93)<br><i>p</i> = 0.007            | 10:201                                        | 1.58 (1.19–2.10)<br><i>p</i> = 0.002            | 2:38                                          | b                                               | 10:172                                                                   | 1.54 (1.16– 2.03)<br><i>p</i> = 0.003           |

<sup>a</sup> Adjusted for age, gender, car ownership, and fruit, vegetable intake. <sup>b</sup> Missing RR due to sparse data.

**Table S2.** Crude risk ratios for the association between salt intake at baseline, measured by urinary sodium creatinine ratio and progression in the gastric precancerous process (11–12 years compared to baseline).

| Outcomes                                                                                | Overall                                 |                                                 | <i>H. pylori</i> Positive at Five Months |                                                 | <i>H. pylori</i> Negative at Five Months <sup>b</sup> |                                                 | Persistent <i>H. pylori</i> (Positive at Five Months and 11–12 years) |                                                 |
|-----------------------------------------------------------------------------------------|-----------------------------------------|-------------------------------------------------|------------------------------------------|-------------------------------------------------|-------------------------------------------------------|-------------------------------------------------|-----------------------------------------------------------------------|-------------------------------------------------|
|                                                                                         | <i>n</i> with: <i>n</i> without Outcome | Risk Ratio (CI)<br><i>p</i> -Value <sup>a</sup> | <i>n</i> with: <i>n</i> without Outcome  | Risk Ratio (CI)<br><i>p</i> -Value <sup>a</sup> | <i>n</i> with: <i>n</i> without Outcome               | Risk Ratio (CI)<br><i>p</i> -Value <sup>a</sup> | <i>n</i> with: <i>n</i> without Outcome                               | Risk Ratio (CI)<br><i>p</i> -Value <sup>a</sup> |
| Overall progression in the gastric precancerous process<br>Total <i>n</i> at risk = 260 | 85:175                                  | 0.90 (0.73–1.09)<br><i>p</i> = 0.28             | 72:144                                   | 0.93 (0.75–1.16)<br><i>p</i> = 0.53             | 13:31                                                 | 0.71 (0.47–1.08)<br><i>p</i> = 0.11             | 64:121                                                                | 0.94 (0.75–1.17)<br><i>p</i> = 0.58             |
| Incident progression to atrophic gastritis<br>Total <i>n</i> at risk = 73               | 28:45                                   | 1.04 (0.81–1.33)<br><i>p</i> = 0.77             | 23:37                                    | 1.05 (0.83–1.34)<br><i>p</i> = 0.67             | 5:8                                                   | 0.86 (0.4–1.86)<br><i>p</i> = 0.70              | 20:29                                                                 | 1.03 (0.79–1.34)<br><i>p</i> = 0.82             |
| Incident progression to intestinal metaplasia<br>Total <i>n</i> at risk = 175           | 63:112                                  | 0.94 (0.77–1.15)<br><i>p</i> = 0.55             | 56:89                                    | 0.95 (0.78–1.17)<br><i>p</i> = 0.65             | 7:23                                                  | 0.82 (0.40–1.69)<br><i>p</i> = 0.59             | 51:73                                                                 | 0.99 (0.82–1.20)<br><i>p</i> = 0.91             |
| Incident progression to dysplasia or gastric cancer<br>Total <i>n</i> at risk = 253     | 10:243                                  | 1.17 (0.81–1.68)<br><i>p</i> = 0.41             | 8:203                                    | 1.35 (0.95–1.91)<br><i>p</i> = 0.09             | 2:40                                                  | 0.36 (0.20–0.66)<br><i>p</i> < 0.0001           | 8:171                                                                 | 1.07 (0.81–1.43)<br><i>p</i> = 0.63             |

**Table S3.** Crude risk ratios for the association between salt intake at baseline, measured by sodium creatinine ratio and progression in the gastric precancerous process (11–12 years compared to five months).

| Outcomes                                                                                | Overall                                 |                                                 | <i>H. pylori</i> Positive at Five Months |                                                 | <i>H. pylori</i> Negative at Five Months |                                                   | Persistent <i>H. pylori</i> (Positive at Five Months and 11–12 years) |                                                 |
|-----------------------------------------------------------------------------------------|-----------------------------------------|-------------------------------------------------|------------------------------------------|-------------------------------------------------|------------------------------------------|---------------------------------------------------|-----------------------------------------------------------------------|-------------------------------------------------|
|                                                                                         | <i>n</i> with: <i>n</i> without Outcome | Risk Ratio (CI)<br><i>p</i> -Value <sup>a</sup> | <i>n</i> with: <i>n</i> without Outcome  | Risk Ratio (CI)<br><i>p</i> -Value <sup>a</sup> | <i>n</i> with: <i>n</i> without Outcome  | Risk Ratio (CI)<br><i>p</i> -Value <sup>a,b</sup> | <i>n</i> with: <i>n</i> without Outcome                               | Risk Ratio (CI)<br><i>p</i> -Value <sup>a</sup> |
| Overall progression in the gastric precancerous process<br>Total <i>n</i> at risk = 253 | 190:63                                  | 0.94 (0.87–1.01)<br><i>p</i> = 0.1              | 163:48                                   | 0.97 (0.9–1.04)<br><i>p</i> = 0.37              | 27:15                                    | 0.8 (0.64–1.01)<br><i>p</i> = 0.06                | 140:42                                                                | 0.95 (0.87–1.03)<br><i>p</i> = 0.19             |
| Incident progression to atrophic gastritis<br>Total <i>n</i> at risk = 180              | 105:75                                  | 1.1 (0.99–1.22)<br><i>p</i> = 0.07              | 92:63                                    | 1.08 (0.97–1.21)<br><i>p</i> = 0.14             | 13:12                                    | 1.31 (0.87–1.95)<br><i>p</i> = 0.19               | 79:50                                                                 | 1.08 (0.97–1.2)<br><i>p</i> = 0.17              |
| Incident progression to intestinal metaplasia<br>Total <i>n</i> at risk = 198           | 90:108                                  | 1.06 (0.91–1.23)<br><i>p</i> = 0.43             | 80:88                                    | 1.05 (0.9–1.23)<br><i>p</i> = 0.53              | 10:20                                    | 1.19 (0.75–1.88)<br><i>p</i> = 0.47               | 69:74                                                                 | 1.05 (0.9–1.23)<br><i>p</i> = 0.53              |
| Incident progression to dysplasia or gastric cancer<br>Total <i>n</i> at risk = 251     | 12:239                                  | 1.38 (1.00–1.91)<br><i>p</i> = 0.05             | 10:201                                   | 1.49 (1.08–2.07)<br><i>p</i> = 0.02             | 2:38                                     | a                                                 | 10:172                                                                | 1.45 (1.05–2.00)<br><i>p</i> = 0.02             |

<sup>a</sup> Missing RR due to sparse data.

**Table S4.** Adjusted risk ratios for the association between salt intake at baseline, measured by the frequency of adding salt to foods, and progression in the gastric precancerous process (11–12 years compared to baseline).

| Outcomes                                                                               | Overall                                 |                                                 | <i>H. pylori</i> + at Five Months       |                                                 | <i>H. pylori</i> - at Five Months       |                                                 | Persistent <i>H. pylori</i> (Positive at Five Months and 11–12 years) |                                              |
|----------------------------------------------------------------------------------------|-----------------------------------------|-------------------------------------------------|-----------------------------------------|-------------------------------------------------|-----------------------------------------|-------------------------------------------------|-----------------------------------------------------------------------|----------------------------------------------|
|                                                                                        | <i>n</i> with: <i>n</i> without Outcome | Risk Ratio (CI)<br><i>p</i> -Value <sup>a</sup> | <i>n</i> with: <i>n</i> without Outcome | Risk Ratio (CI)<br><i>p</i> -Value <sup>a</sup> | <i>n</i> with: <i>n</i> without Outcome | Risk Ratio (CI)<br><i>p</i> -Value <sup>a</sup> | <i>n</i> with: <i>n</i> without Outcome                               | Risk Ratio (CI) <i>p</i> -Value <sup>a</sup> |
| Overall progression in the gastric precancerous process<br>Total <i>n</i> at risk =295 | 104:191                                 | 1.09 (0.85–1.4)<br><i>p</i> = 0.50              | 91:160                                  | 1.07 (0.78–1.45)<br><i>p</i> = 0.68             | 13:31                                   | 0.89 (0.50–1.57)<br><i>p</i> = 0.69             | 76:130                                                                | 1.08 (0.81–1.44)<br><i>p</i> = 0.58          |
| Incident progression to atrophic gastritis<br>Total <i>n</i> at risk = 98              | 38:60                                   | 0.69 (0.46–1.04)<br><i>p</i> = 0.07             | 33:51                                   | 0.69 (0.39–1.21)<br><i>p</i> = 0.2              | 5:9                                     | 0.60 (0.18–2.03)<br><i>p</i> = 0.41             | 28:36                                                                 | 0.86 (0.53–1.42)<br><i>p</i> = 0.56          |
| Incident progression to intestinal metaplasia<br>Total <i>n</i> at risk = 203          | 71:132                                  | 1.08 (0.80–1.45)<br><i>p</i> = 0.61             | 64:109                                  | 1.13 (0.80–1.61)<br><i>p</i> = 0.48             | 7:23                                    | 1.86 (0.79–4.37)<br><i>p</i> = 0.15             | 57:84                                                                 | 1.08 (0.78–1.51)<br><i>p</i> = 0.63          |
| Incident progression to dysplasia or gastric cancer<br>Total <i>n</i> at risk = 288    | 12:276                                  | 1.07 (0.49–2.37)<br><i>p</i> = 0.86             | 10:236                                  | 2.59 (0.65–0.34)<br><i>p</i> = 0.18             | 2:40                                    | <sup>b</sup>                                    | 9:192                                                                 | 1.38 (0.52–3.67)<br><i>p</i> = 0.51          |

<sup>a</sup> Adjusted for age, gender, car ownership, and fruit, vegetable intake. <sup>b</sup> Missing RR due to sparse data.

**Table S5.** Adjusted risk ratios for the association between salt intake at baseline, measured as total salt added to food, and progression in the gastric precancerous process (11–12 years compared to baseline).

| Outcomes                                                                                | Overall                                 |                                                 | <i>H. pylori</i> + at Five Months       |                                                 | <i>H. pylori</i> - at Five Months <sup>b</sup> |                                                 | Persistent <i>H. pylori</i> (Positive at five Months and 11–12 years) |                                                 |
|-----------------------------------------------------------------------------------------|-----------------------------------------|-------------------------------------------------|-----------------------------------------|-------------------------------------------------|------------------------------------------------|-------------------------------------------------|-----------------------------------------------------------------------|-------------------------------------------------|
|                                                                                         | <i>n</i> with: <i>n</i> without Outcome | Risk Ratio (CI)<br><i>p</i> -Value <sup>a</sup> | <i>n</i> with: <i>n</i> without Outcome | Risk Ratio (CI)<br><i>p</i> -Value <sup>a</sup> | <i>n</i> with: <i>n</i> without Outcome        | Risk Ratio (CI)<br><i>p</i> -Value <sup>a</sup> | <i>n</i> with: <i>n</i> without Outcome                               | Risk Ratio (CI)<br><i>p</i> -Value <sup>a</sup> |
| Overall progression in the gastric precancerous process<br>Total <i>n</i> at risk = 295 | 104:191                                 | 0.98 (0.85–1.14)<br><i>p</i> = 0.82             | 91:160                                  | 1 (0.86–1.16)<br><i>p</i> = 0.98                | 13:31                                          | 1.02 (0.71–1.47)<br><i>p</i> = 0.91             | 76:140                                                                | 0.97 (0.82–1.15)<br><i>p</i> = 0.72             |
| Incident progression to atrophic gastritis<br>Total <i>n</i> at risk = 98               | 38:60                                   | 1.01 (0.79–1.28)<br><i>p</i> = 0.96             | 33:51                                   | 1.04 (0.81–1.34)<br><i>p</i> = 0.75             | 5:9                                            | 0.67 (0.32–1.41)<br><i>p</i> = 0.29             | 28:36                                                                 | 1.11 (0.84–1.47)<br><i>p</i> = 0.47             |
| Incident progression to intestinal metaplasia<br>Total <i>n</i> at risk = 203           | 71:132                                  | 1.05 (0.88–1.25)<br><i>p</i> = 0.57             | 64:109                                  | 1.04 (0.87–1.26)<br><i>p</i> = 0.65             | 7:123                                          | 1.01 (0.63–1.63)<br><i>p</i> = 0.97             | 57:84                                                                 | 1.01 (0.83–1.24)<br><i>p</i> = 0.91             |
| Incident progression to dysplasia or gastric cancer<br>Total <i>n</i> at risk = 288     | 12:276                                  | 1.15 (0.81–1.65)<br><i>p</i> = 0.44             | 10:236                                  | 1.14 (0.77–1.67)<br><i>p</i> = 0.52             | 2:40                                           | b                                               | 9:192                                                                 | 1.23 (0.86–1.78)<br><i>p</i> = 0.26             |

<sup>a</sup> Adjusted for age, gender, car ownership, and fruit, vegetable intake. <sup>b</sup> Missing RR due to sparse data.
